# Supplementary material for: Magnoflorine from Berberis vulgaris Roots—Impact on Hippocampal Neurons in Mice after Short-Term Exposure
Source: MDPI journal article supplement (doi:10.3390/ijms24087166), 2023-04-12

## Supplementary File

**Figure S1.** Chromatograms of the upper and lower phases of the selected solvent system recorded at 254 nm with magnoflorine at 21 min.

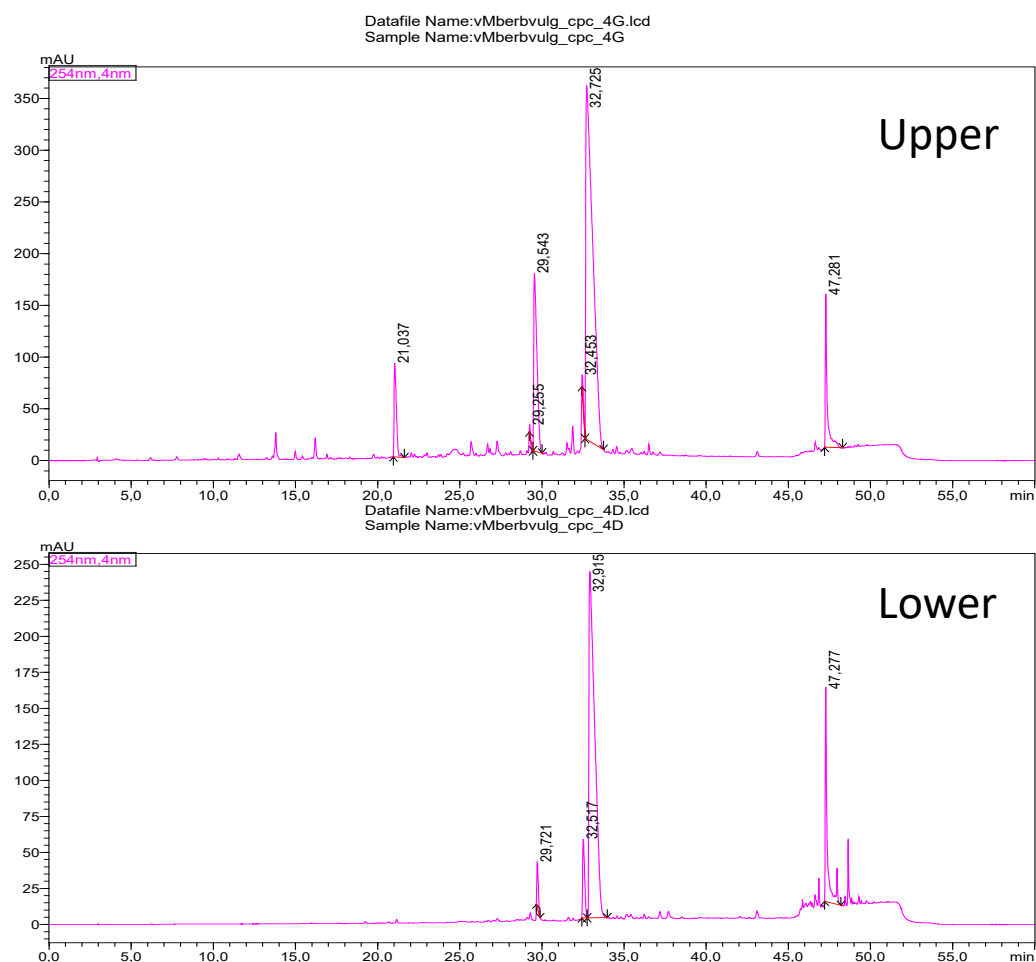

**Figure S2.** TLC chromatogram at 254 nm of a normal phase plate with fraction 40 rich in MAG and MAG standard on the right

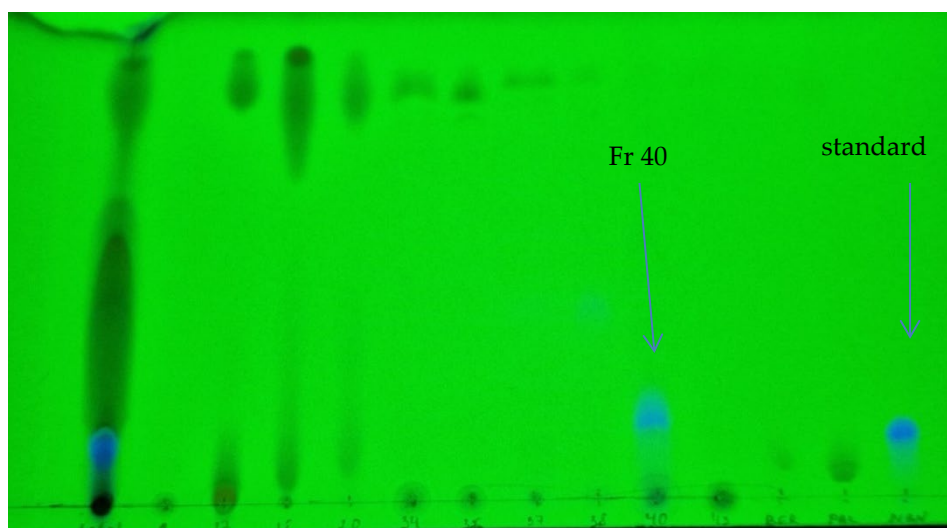

Supplement: s1 [file s1]
